# Supplementary material for: Pachydictyols B and C: New Diterpenes from Dictyota dichotoma Hudson
Source: MDPI journal article supplement (doi:10.3390/md11093109), 2013-08-22
Supplement: s2 [file s2]

marinedrugs-11-03109-s001.mol
  corina  12171321203D 1   1.00000     0.00000 
CORINA 3.49 0023  12.04.2013
 26 27  0  0  0  0  0  0  0  0999 V2000
   -0.3454    0.9706   -1.3434 C   0  0  0  0  0  0  0  0  0  0  0  0
   -0.6077   -0.5096   -1.3012 C   0  0  0  0  0  0  0  0  0  0  0  0
    1.0835    1.0195   -1.9322 C   0  0  0  0  0  0  0  0  0  0  0  0
    1.6842   -0.3146   -1.5351 C   0  0  0  0  0  0  0  0  0  0  0  0
    0.7468   -1.1630   -1.1818 C   0  0  0  0  0  0  0  0  0  0  0  0
   -3.9991   -0.9152    0.4319 C   0  0  0  0  0  0  0  0  0  0  0  0
   -3.5253   -1.4286    1.7931 C   0  0  0  0  0  0  0  0  0  0  0  0
   -4.6236   -2.2361    2.4355 C   0  0  0  0  0  0  0  0  0  0  0  0
   -4.3907   -3.4646    2.8260 C   0  0  0  0  0  0  0  0  0  0  0  0
   -5.4891   -4.2721    3.4684 C   0  0  0  0  0  0  0  0  0  0  0  0
   -5.0630   -4.6805    4.8800 C   0  0  0  0  0  0  0  0  0  0  0  0
   -6.6798   -3.4851    3.5393 O   0  0  0  0  0  0  0  0  0  0  0  0
   -5.7555   -5.5260    2.6333 C   0  0  0  0  0  0  0  0  0  0  0  0
    0.9878   -2.5785   -0.7244 C   0  0  0  0  0  0  0  0  0  0  0  0
   -0.3865    1.4157   -0.3493 H   0  0  0  0  0  0  0  0  0  0  0  0
   -5.2068    0.0038    0.6256 C   0  0  0  0  0  0  0  0  0  0  0  0
   -0.9978   -0.7861   -2.2808 H   0  0  0  0  0  0  0  0  0  0  0  0
   -1.5996   -1.0272   -0.2878 C   0  0  0  0  0  0  0  0  0  0  0  0
   -2.8677   -0.1355   -0.2411 C   0  0  0  0  0  0  0  0  0  0  0  0
   -3.3146    0.2862   -1.6161 C   0  0  0  0  0  0  0  0  0  0  0  0
   -2.7313    1.6737   -1.9265 C   0  0  0  0  0  0  0  0  0  0  0  0
   -1.3249    1.6165   -2.3036 C   0  0  0  0  0  0  0  0  0  0  0  0
   -0.9165    2.1113   -3.4458 C   0  0  0  0  0  0  0  0  0  0  0  0
   -2.6529    0.7547    0.3500 H   0  0  0  0  0  0  0  0  0  0  0  0
   -4.3703   -2.0223   -0.3919 O   0  0  0  0  0  0  0  0  0  0  0  0
   -1.9766   -2.3601   -0.6393 O   0  0  0  0  0  0  0  0  0  0  0  0
  1  2  1  0      
  1  3  1  0      
  3  4  1  0      
  4  5  2  0      
  5  2  1  0      
  6  7  1  0      
  7  8  1  0      
  8  9  2  0      
  9 10  1  4      
 10 11  1  0      
 10 12  1  0      
 10 13  1  0      
  5 14  1  0      
  1 15  1  0      
  6 16  1  0      
  2 17  1  0      
  2 18  1  0      
 18 19  1  0      
 19 20  1  0      
 20 21  1  0      
 21 22  1  0      
 22  1  1  0      
  6 19  1  0      
 22 23  2  0      
 19 24  1  0      
  6 25  1  0      
 18 26  1  0      
M  END
$$$$
