# Supplementary material for: Pachydictyols B and C: New Diterpenes from Dictyota dichotoma Hudson
Source: MDPI journal article supplement (doi:10.3390/md11093109), 2013-08-22
Supplement: s3 [file s3]

marinedrugs-11-03109-s001.mol
  ChemDraw11261316252D

 26 27  0  0  0  0  0  0  0  0999 V2000
   -2.1649    1.0621    0.0000 C   0  0  0  0  0  0  0  0  0  0  0  0
   -2.1649    0.2371    0.0000 C   0  0  0  0  0  0  0  0  0  0  0  0
   -2.9495    1.3171    0.0000 C   0  0  0  0  0  0  0  0  0  0  0  0
   -3.4345    0.6496    0.0000 C   0  0  0  0  0  0  0  0  0  0  0  0
   -2.9495   -0.0178    0.0000 C   0  0  0  0  0  0  0  0  0  0  0  0
   -0.1717   -0.6704    0.0000 C   0  0  0  0  0  0  0  0  0  0  0  0
    0.6121   -0.6704    0.0000 C   0  0  0  0  0  0  0  0  0  0  0  0
    1.2292   -1.2891    0.0000 C   0  0  0  0  0  0  0  0  0  0  0  0
    2.0261   -1.0756    0.0000 C   0  0  0  0  0  0  0  0  0  0  0  0
    2.6095   -1.6589    0.0000 C   0  0  0  0  0  0  0  0  0  0  0  0
    2.1970   -2.3734    0.0000 C   0  0  0  0  0  0  0  0  0  0  0  0
    3.0220   -2.3734    0.0000 O   0  0  0  0  0  0  0  0  0  0  0  0
    3.4345   -1.6589    0.0000 C   0  0  0  0  0  0  0  0  0  0  0  0
   -3.3620   -0.7323    0.0000 C   0  0  0  0  0  0  0  0  0  0  0  0
   -2.5774    1.7766    0.0000 H   0  0  0  0  0  0  0  0  0  0  0  0
    0.2879   -1.4055    0.0000 C   0  0  0  0  0  0  0  0  0  0  0  0
   -2.1649   -0.5879    0.0000 H   0  0  0  0  0  0  0  0  0  0  0  0
   -1.5199   -0.2772    0.0000 C   0  0  0  0  0  0  0  0  0  0  0  0
   -0.7568   -0.0937    0.0000 C   0  0  0  0  0  0  0  0  0  0  0  0
   -0.3576    0.6496    0.0000 C   0  0  0  0  0  0  0  0  0  0  0  0
   -0.7156    1.3929    0.0000 C   0  0  0  0  0  0  0  0  0  0  0  0
   -1.5199    1.5765    0.0000 C   0  0  0  0  0  0  0  0  0  0  0  0
   -1.7334    2.3734    0.0000 C   0  0  0  0  0  0  0  0  0  0  0  0
    0.0400    0.1199    0.0000 H   0  0  0  0  0  0  0  0  0  0  0  0
   -0.7551   -1.2537    0.0000 O   0  0  0  0  0  0  0  0  0  0  0  0
   -1.9324   -0.9917    0.0000 O   0  0  0  0  0  0  0  0  0  0  0  0
  1  2  1  0      
  1  3  1  0      
  3  4  1  0      
  4  5  2  0      
  5  2  1  0      
  6  7  1  0      
  7  8  1  0      
  8  9  2  0      
  9 10  1  4      
 10 11  1  0      
 10 12  1  0      
 10 13  1  0      
  5 14  1  0      
  1 15  1  6      
  6 16  1  1      
  2 17  1  1      
  2 18  1  0      
 18 19  1  0      
 19 20  1  0      
 20 21  1  0      
 21 22  1  0      
 22  1  1  0      
  6 19  1  0      
 22 23  2  0      
 19 24  1  6      
  6 25  1  6      
 18 26  1  1      
M  END
