# Supplementary material for: Pachydictyols B and C: New Diterpenes from Dictyota dichotoma Hudson
Source: MDPI journal article supplement (doi:10.3390/md11093109), 2013-08-22
Supplement: s4 [file s4]

marinedrugs-11-03109-s002.mol
  corina  12171321213D 1   1.00000     0.00000 
CORINA 3.49 0023  12.04.2013
 25 26  0  0  0  0  0  0  0  0999 V2000
   -1.1328    2.0199   -1.4433 C   0  0  0  0  0  0  0  0  0  0  0  0
   -0.9180    0.5420   -1.5730 C   0  0  0  0  0  0  0  0  0  0  0  0
    0.1194    2.5977   -2.1470 C   0  0  0  0  0  0  0  0  0  0  0  0
    1.1444    1.4879   -2.0446 C   0  0  0  0  0  0  0  0  0  0  0  0
    0.5743    0.3517   -1.7286 C   0  0  0  0  0  0  0  0  0  0  0  0
   -3.6257   -1.0744    0.5993 C   0  0  0  0  0  0  0  0  0  0  0  0
   -2.7787   -1.5827    1.7676 C   0  0  0  0  0  0  0  0  0  0  0  0
   -3.4923   -2.7557    2.4426 C   0  0  0  0  0  0  0  0  0  0  0  0
   -2.6580   -3.2564    3.5934 C   0  0  0  0  0  0  0  0  0  0  0  0
   -3.1773   -3.3349    4.7935 C   0  0  0  0  0  0  0  0  0  0  0  0
   -4.6090   -2.9245    5.0233 C   0  0  0  0  0  0  0  0  0  0  0  0
   -2.3430   -3.8355    5.9442 C   0  0  0  0  0  0  0  0  0  0  0  0
    1.3006   -0.9561   -1.5457 C   0  0  0  0  0  0  0  0  0  0  0  0
   -1.1712    2.3215   -0.3966 H   0  0  0  0  0  0  0  0  0  0  0  0
   -4.9793   -0.5906    1.1233 C   0  0  0  0  0  0  0  0  0  0  0  0
   -1.3789    0.2285   -2.5096 H   0  0  0  0  0  0  0  0  0  0  0  0
   -1.4671   -0.3652   -0.4827 C   0  0  0  0  0  0  0  0  0  0  0  0
   -2.9017    0.0843   -0.0894 C   0  0  0  0  0  0  0  0  0  0  0  0
   -3.6690    0.4930   -1.3168 C   0  0  0  0  0  0  0  0  0  0  0  0
   -3.5797    2.0081   -1.4688 C   0  0  0  0  0  0  0  0  0  0  0  0
   -2.3898    2.4681   -2.2091 C   0  0  0  0  0  0  0  0  0  0  0  0
   -2.8406    0.9290    0.5967 H   0  0  0  0  0  0  0  0  0  0  0  0
   -3.8288   -2.1337   -0.3381 O   0  0  0  0  0  0  0  0  0  0  0  0
   -1.5063   -1.7113   -0.9610 O   0  0  0  0  0  0  0  0  0  0  0  0
   -2.4094    3.9942   -2.3159 C   0  0  0  0  0  0  0  0  0  0  0  0
  1  2  1  0      
  1  3  1  0      
  3  4  1  0      
  4  5  2  0      
  5  2  1  0      
  6  7  1  0      
  7  8  1  0      
  8  9  1  0      
 10 11  1  0      
 10 12  1  0      
  5 13  1  0      
  1 14  1  0      
  6 15  1  0      
  2 16  1  0      
  2 17  1  0      
 17 18  1  0      
 18 19  1  0      
 19 20  1  0      
 20 21  1  0      
 21  1  1  0      
  6 18  1  0      
 18 22  1  0      
  6 23  1  0      
 17 24  1  0      
  9 10  2  0      
 21 25  1  0      
M  END
$$$$
