# Supplementary material for: Pachydictyols B and C: New Diterpenes from Dictyota dichotoma Hudson
Source: MDPI journal article supplement (doi:10.3390/md11093109), 2013-08-22
Supplement: s6 [file s6]

marinedrugs-11-03109-s003.mol
  corina  12171321213D 1   1.00000     0.00000 
CORINA 3.49 0023  12.04.2013
 24 25  0  0  0  0  0  0  0  0999 V2000
   -0.1782    1.5897    0.2163 C   0  0  0  0  0  0  0  0  0  0  0  0
   -0.2819    0.1475   -0.1973 C   0  0  0  0  0  0  0  0  0  0  0  0
    1.3394    1.8489    0.0729 C   0  0  0  0  0  0  0  0  0  0  0  0
    1.9600    0.4786    0.2613 C   0  0  0  0  0  0  0  0  0  0  0  0
    1.0604   -0.4663    0.1146 C   0  0  0  0  0  0  0  0  0  0  0  0
   -3.9375   -0.8389    0.3798 C   0  0  0  0  0  0  0  0  0  0  0  0
   -3.7836   -1.6760    1.6512 C   0  0  0  0  0  0  0  0  0  0  0  0
   -4.8881   -2.7335    1.7023 C   0  0  0  0  0  0  0  0  0  0  0  0
   -4.7366   -3.5581    2.9546 C   0  0  0  0  0  0  0  0  0  0  0  0
   -5.7403   -3.6730    3.7886 C   0  0  0  0  0  0  0  0  0  0  0  0
   -7.0464   -2.9807    3.4957 C   0  0  0  0  0  0  0  0  0  0  0  0
   -5.5887   -4.4975    5.0409 C   0  0  0  0  0  0  0  0  0  0  0  0
    1.3286   -1.9439    0.2398 C   0  0  0  0  0  0  0  0  0  0  0  0
   -0.5171    1.7404    1.2413 H   0  0  0  0  0  0  0  0  0  0  0  0
   -5.2483   -0.0524    0.4425 C   0  0  0  0  0  0  0  0  0  0  0  0
   -0.3794    0.1398   -1.2829 H   0  0  0  0  0  0  0  0  0  0  0  0
   -1.4364   -0.6644    0.3383 C   0  0  0  0  0  0  0  0  0  0  0  0
   -2.7632    0.1352    0.2653 C   0  0  0  0  0  0  0  0  0  0  0  0
   -2.8904    0.9056   -1.0225 C   0  0  0  0  0  0  0  0  0  0  0  0
   -2.4002    2.3440   -0.7939 C   0  0  0  0  0  0  0  0  0  0  0  0
   -0.9464    2.4420   -0.7745 C   0  0  0  0  0  0  0  0  0  0  0  0
   -2.8020    0.8338    1.1011 H   0  0  0  0  0  0  0  0  0  0  0  0
   -1.5665   -1.8600   -0.4336 O   0  0  0  0  0  0  0  0  0  0  0  0
   -0.3179    3.2475   -1.5945 C   0  0  0  0  0  0  0  0  0  0  0  0
  1  2  1  0      
  1  3  1  0      
  3  4  1  0      
  4  5  2  0      
  5  2  1  0      
  6  7  1  0      
  7  8  1  0      
  8  9  1  0      
 10 11  1  0      
 10 12  1  0      
  5 13  1  0      
  1 14  1  0      
  6 15  1  0      
  2 16  1  0      
  2 17  1  0      
 17 18  1  0      
 18 19  1  0      
 19 20  1  0      
 20 21  1  0      
 21  1  1  0      
  6 18  1  0      
 18 22  1  0      
 17 23  1  0      
  9 10  2  0      
 21 24  2  0      
M  END
$$$$
