# Supplementary material for: Pachydictyols B and C: New Diterpenes from Dictyota dichotoma Hudson
Source: MDPI journal article supplement (doi:10.3390/md11093109), 2013-08-22
Supplement: s8 [file s8]

marinedrugs-11-03109-s004.mol
  corina  12171321213D 1   1.00000     0.00000 
CORINA 3.49 0023  12.04.2013
 25 26  0  0  0  0  0  0  0  0999 V2000
   -1.0185    2.3246   -0.2461 C   0  0  0  0  0  0  0  0  0  0  0  0
   -0.7491    0.8728   -0.5320 C   0  0  0  0  0  0  0  0  0  0  0  0
    0.3670    2.9586   -0.5090 C   0  0  0  0  0  0  0  0  0  0  0  0
    1.3391    1.8245   -0.2493 C   0  0  0  0  0  0  0  0  0  0  0  0
    0.7202    0.6668   -0.2587 C   0  0  0  0  0  0  0  0  0  0  0  0
   -3.9802   -0.9795    0.3613 C   0  0  0  0  0  0  0  0  0  0  0  0
   -3.5279   -1.6441    1.6631 C   0  0  0  0  0  0  0  0  0  0  0  0
   -4.4622   -2.8102    1.9918 C   0  0  0  0  0  0  0  0  0  0  0  0
   -4.0167   -3.4648    3.2740 C   0  0  0  0  0  0  0  0  0  0  0  0
   -4.8634   -3.6123    4.2627 C   0  0  0  0  0  0  0  0  0  0  0  0
   -6.3133   -3.2475    4.0738 C   0  0  0  0  0  0  0  0  0  0  0  0
   -4.3875   -4.1468    5.5889 C   0  0  0  0  0  0  0  0  0  0  0  0
    1.3792   -0.6690   -0.0301 C   0  0  0  0  0  0  0  0  0  0  0  0
   -1.3432    2.4792    0.7828 H   0  0  0  0  0  0  0  0  0  0  0  0
   -0.8852    0.7349   -1.6046 H   0  0  0  0  0  0  0  0  0  0  0  0
   -1.6210   -0.1583    0.1427 C   0  0  0  0  0  0  0  0  0  0  0  0
   -3.1154    0.2533    0.0907 C   0  0  0  0  0  0  0  0  0  0  0  0
   -3.4967    0.8349   -1.2451 C   0  0  0  0  0  0  0  0  0  0  0  0
   -3.4007    2.3667   -1.1681 C   0  0  0  0  0  0  0  0  0  0  0  0
   -2.0268    2.8450   -1.2516 C   0  0  0  0  0  0  0  0  0  0  0  0
   -3.3057    0.9945    0.8669 H   0  0  0  0  0  0  0  0  0  0  0  0
   -1.4577   -1.4149   -0.5180 O   0  0  0  0  0  0  0  0  0  0  0  0
   -1.6711    3.7042   -2.1743 C   0  0  0  0  0  0  0  0  0  0  0  0
   -3.8418   -1.9048   -0.7190 O   0  0  0  0  0  0  0  0  0  0  0  0
   -5.4454   -0.5572    0.4865 C   0  0  0  0  0  0  0  0  0  0  0  0
  1  2  1  0      
  1  3  1  0      
  3  4  1  0      
  4  5  2  0      
  5  2  1  0      
  6  7  1  0      
  7  8  1  0      
  8  9  1  0      
 10 11  1  0      
 10 12  1  0      
  5 13  1  0      
  1 14  1  0      
  2 15  1  0      
  2 16  1  0      
 16 17  1  0      
 17 18  1  0      
 18 19  1  0      
 19 20  1  0      
 20  1  1  0      
  6 17  1  0      
 17 21  1  0      
 16 22  1  0      
  9 10  2  0      
 20 23  2  0      
  6 24  1  0      
  6 25  1  0      
M  END
$$$$
