# Supplementary material for: Pachydictyols B and C: New Diterpenes from Dictyota dichotoma Hudson
Source: MDPI journal article supplement (doi:10.3390/md11093109), 2013-08-22
Supplement: s9 [file s9]

marinedrugs-11-03109-s004.mol
  ChemDraw11261316272D

 25 26  0  0  0  0  0  0  0  0999 V2000
   -2.1443    1.0827    0.0000 C   0  0  0  0  0  0  0  0  0  0  0  0
   -2.1443    0.2577    0.0000 C   0  0  0  0  0  0  0  0  0  0  0  0
   -2.9289    1.3377    0.0000 C   0  0  0  0  0  0  0  0  0  0  0  0
   -3.4138    0.6702    0.0000 C   0  0  0  0  0  0  0  0  0  0  0  0
   -2.9289    0.0028    0.0000 C   0  0  0  0  0  0  0  0  0  0  0  0
   -0.1511   -0.6498    0.0000 C   0  0  0  0  0  0  0  0  0  0  0  0
    0.6327   -0.6498    0.0000 C   0  0  0  0  0  0  0  0  0  0  0  0
    1.2086   -1.2273    0.0000 C   0  0  0  0  0  0  0  0  0  0  0  0
    2.0055   -1.0137    0.0000 C   0  0  0  0  0  0  0  0  0  0  0  0
    2.5888   -1.5971    0.0000 C   0  0  0  0  0  0  0  0  0  0  0  0
    2.1763   -2.3116    0.0000 C   0  0  0  0  0  0  0  0  0  0  0  0
    3.4138   -1.5971    0.0000 C   0  0  0  0  0  0  0  0  0  0  0  0
   -3.3414   -0.7117    0.0000 C   0  0  0  0  0  0  0  0  0  0  0  0
   -2.5568    1.7972    0.0000 H   0  0  0  0  0  0  0  0  0  0  0  0
   -2.1443   -0.5673    0.0000 H   0  0  0  0  0  0  0  0  0  0  0  0
   -1.4993   -0.2566    0.0000 C   0  0  0  0  0  0  0  0  0  0  0  0
   -0.7362   -0.0731    0.0000 C   0  0  0  0  0  0  0  0  0  0  0  0
   -0.3370    0.6702    0.0000 C   0  0  0  0  0  0  0  0  0  0  0  0
   -0.6950    1.4135    0.0000 C   0  0  0  0  0  0  0  0  0  0  0  0
   -1.4993    1.5971    0.0000 C   0  0  0  0  0  0  0  0  0  0  0  0
    0.0607    0.1405    0.0000 H   0  0  0  0  0  0  0  0  0  0  0  0
   -1.9118   -0.9711    0.0000 O   0  0  0  0  0  0  0  0  0  0  0  0
   -1.9118    2.3116    0.0000 C   0  0  0  0  0  0  0  0  0  0  0  0
   -0.5636   -1.3642    0.0000 O   0  0  0  0  0  0  0  0  0  0  0  0
    0.0625   -1.4467    0.0000 C   0  0  0  0  0  0  0  0  0  0  0  0
  1  2  1  0      
  1  3  1  0      
  3  4  1  0      
  4  5  2  0      
  5  2  1  0      
  6  7  1  0      
  7  8  1  0      
  8  9  1  0      
 10 11  1  0      
 10 12  1  0      
  5 13  1  0      
  1 14  1  6      
  2 15  1  1      
  2 16  1  0      
 16 17  1  0      
 17 18  1  0      
 18 19  1  0      
 19 20  1  0      
 20  1  1  0      
  6 17  1  0      
 17 21  1  6      
 16 22  1  1      
  9 10  2  0      
 20 23  2  0      
  6 24  1  0      
  6 25  1  0      
M  END
