# Supplementary material for: Pachydictyols B and C: New Diterpenes from Dictyota dichotoma Hudson
Source: MDPI journal article supplement (doi:10.3390/md11093109), 2013-08-22
Supplement: s10 [file s10]

marinedrugs-11-03109-s005.mol
  corina  12171321223D 1   1.00000     0.00000 
CORINA 3.49 0023  12.04.2013
 17 19  0  0  0  0  0  0  0  0999 V2000
   -0.0735    1.7920    0.0460 C   0  0  0  0  0  0  0  0  0  0  0  0
   -0.4466    0.2670   -0.1462 C   0  0  0  0  0  0  0  0  0  0  0  0
    1.4540    1.6706    0.2099 C   0  0  0  0  0  0  0  0  0  0  0  0
    1.5906    0.4856    1.2040 C   0  0  0  0  0  0  0  0  0  0  0  0
    0.3440   -0.4063    0.9735 C   0  0  0  0  0  0  0  0  0  0  0  0
   -1.9625    0.2967    0.0127 C   0  0  0  0  0  0  0  0  0  0  0  0
   -2.6446   -0.0354   -1.4135 C   0  0  0  0  0  0  0  0  0  0  0  0
   -1.5949    0.4572   -2.4584 C   0  0  0  0  0  0  0  0  0  0  0  0
   -1.1215    1.8617   -2.2683 C   0  0  0  0  0  0  0  0  0  0  0  0
   -0.4853    2.6065   -1.1781 C   0  0  0  0  0  0  0  0  0  0  0  0
   -0.1067   -0.0887   -1.1024 H   0  0  0  0  0  0  0  0  0  0  0  0
   -0.4479   -0.5202    2.2737 C   0  0  0  0  0  0  0  0  0  0  0  0
   -1.9542    2.8715   -1.4775 C   0  0  0  0  0  0  0  0  0  0  0  0
   -0.6584    2.3193    1.2298 O   0  0  0  0  0  0  0  0  0  0  0  0
    0.4970    3.7296   -1.5503 C   0  0  0  0  0  0  0  0  0  0  0  0
   -2.7842   -1.5597   -1.5153 C   0  0  0  0  0  0  0  0  0  0  0  0
   -3.9925    0.6355   -1.5554 C   0  0  0  0  0  0  0  0  0  0  0  0
  1  2  1  0      
  1  3  1  0      
  3  4  1  0      
  4  5  1  0      
  5  2  1  0      
  2  6  1  0      
  6  7  1  0      
  7  8  1  0      
  8  9  1  0      
  9 10  1  0      
 10  1  1  0      
  2 11  1  4      
  5 12  1  0      
 10 13  1  0      
  9 13  1  0      
  1 14  1  0      
 10 15  1  0      
  7 16  1  0      
  7 17  1  0      
M  END
$$$$
