# Supplementary material for: Pachydictyols B and C: New Diterpenes from Dictyota dichotoma Hudson
Source: MDPI journal article supplement (doi:10.3390/md11093109), 2013-08-22
Supplement: s11 [file s11]

marinedrugs-11-03109-s005.mol
  ChemDraw12021308432D

 17 19  0  0  0  0  0  0  0  0999 V2000
   -0.4265    0.3348    0.0000 C   0  0  0  0  0  0  0  0  0  0  0  0
   -0.4265   -0.4902    0.0000 C   0  0  0  0  0  0  0  0  0  0  0  0
   -1.2111    0.5897    0.0000 C   0  0  0  0  0  0  0  0  0  0  0  0
   -1.6960   -0.0777    0.0000 C   0  0  0  0  0  0  0  0  0  0  0  0
   -1.2111   -0.7452    0.0000 C   0  0  0  0  0  0  0  0  0  0  0  0
    0.2185   -1.0046    0.0000 C   0  0  0  0  0  0  0  0  0  0  0  0
    0.9816   -0.8210    0.0000 C   0  0  0  0  0  0  0  0  0  0  0  0
    1.3808   -0.0777    0.0000 C   0  0  0  0  0  0  0  0  0  0  0  0
    1.0228    0.6656    0.0000 C   0  0  0  0  0  0  0  0  0  0  0  0
    0.2185    0.8491    0.0000 C   0  0  0  0  0  0  0  0  0  0  0  0
   -0.4265   -1.3152    0.0000 H   0  0  0  0  0  0  0  0  0  0  0  0
   -1.6236   -1.4596    0.0000 C   0  0  0  0  0  0  0  0  0  0  0  0
    0.9330    1.2616    0.0000 C   0  0  0  0  0  0  0  0  0  0  0  0
   -0.4265    1.1598    0.0000 O   0  0  0  0  0  0  0  0  0  0  0  0
    0.0050    1.6460    0.0000 C   0  0  0  0  0  0  0  0  0  0  0  0
    0.9816   -1.6460    0.0000 C   0  0  0  0  0  0  0  0  0  0  0  0
    1.6960   -1.2335    0.0000 C   0  0  0  0  0  0  0  0  0  0  0  0
  1  2  1  0      
  1  3  1  0      
  3  4  1  0      
  4  5  1  0      
  5  2  1  0      
  2  6  1  0      
  6  7  1  0      
  7  8  1  0      
  8  9  1  0      
  9 10  1  0      
 10  1  1  0      
  2 11  1  4      
  5 12  1  6      
 10 13  1  6      
  9 13  1  6      
  1 14  1  6      
 10 15  1  1      
  7 16  1  0      
  7 17  1  0      
M  END
