# Supplementary material for: Pachydictyols B and C: New Diterpenes from Dictyota dichotoma Hudson
Source: MDPI journal article supplement (doi:10.3390/md11093109), 2013-08-22
Supplement: s12 [file s12]

marinedrugs-11-03109-s006.mol
  corina  12171321223D 1   1.00000     0.00000 
CORINA 3.49 0023  12.04.2013
 33 36  0  0  0  0  0  0  0  0999 V2000
   -0.0186    1.5217    0.0104 C   0  0  0  0  0  0  0  0  0  0  0  0
    0.0021   -0.0041    0.0020 C   0  0  0  0  0  0  0  0  0  0  0  0
    0.8619   -0.5698    1.1406 C   0  0  0  0  0  0  0  0  0  0  0  0
    2.2527    0.0230    1.0036 C   0  0  0  0  0  0  0  0  0  0  0  0
    2.1233    1.5556    1.2124 C   0  0  0  0  0  0  0  0  0  0  0  0
    1.4004    2.1112    0.0000 C   0  0  0  0  0  0  0  0  0  0  0  0
   -1.4179   -0.5378    0.0910 C   0  0  0  0  0  0  0  0  0  0  0  0
   -1.4879   -1.9658    0.5444 C   0  0  0  0  0  0  0  0  0  0  0  0
   -0.4557   -2.6531    0.9371 C   0  0  0  0  0  0  0  0  0  0  0  0
    0.9357   -2.0916    0.9727 C   0  0  0  0  0  0  0  0  0  0  0  0
    3.2509   -0.3574    2.1027 C   0  0  0  0  0  0  0  0  0  0  0  0
    4.2941    0.7914    2.0371 C   0  0  0  0  0  0  0  0  0  0  0  0
    3.5677    2.0058    1.4070 C   0  0  0  0  0  0  0  0  0  0  0  0
    5.1499    4.7217    3.6274 C   0  0  0  0  0  0  0  0  0  0  0  0
    5.0851    3.6022    2.5865 C   0  0  0  0  0  0  0  0  0  0  0  0
    3.6256    3.2073    2.3526 C   0  0  0  0  0  0  0  0  0  0  0  0
    7.5057    2.8754    4.4137 C   0  0  0  0  0  0  0  0  0  0  0  0
    7.4274    4.3414    4.8445 C   0  0  0  0  0  0  0  0  0  0  0  0
    6.5875    5.1108    3.8578 C   0  0  0  0  0  0  0  0  0  0  0  0
    6.7929    4.4315    6.2338 C   0  0  0  0  0  0  0  0  0  0  0  0
    8.5446    6.5067    3.4308 C   0  0  0  0  0  0  0  0  0  0  0  0
    7.1070    6.1177    3.2004 C   0  0  0  0  0  0  0  0  0  0  0  0
    1.3104    1.8406    2.4769 C   0  0  0  0  0  0  0  0  0  0  0  0
    0.4320   -0.3036    2.1062 H   0  0  0  0  0  0  0  0  0  0  0  0
   -2.1887    0.3205    1.0960 C   0  0  0  0  0  0  0  0  0  0  0  0
   -2.1152   -0.3992   -1.2654 C   0  0  0  0  0  0  0  0  0  0  0  0
   -3.5367   -0.9561   -1.1649 C   0  0  0  0  0  0  0  0  0  0  0  0
   -3.4830   -2.4494   -0.8376 C   0  0  0  0  0  0  0  0  0  0  0  0
   -2.8464   -2.6463    0.5414 C   0  0  0  0  0  0  0  0  0  0  0  0
    2.6603   -0.1930    0.0160 H   0  0  0  0  0  0  0  0  0  0  0  0
    0.4254   -0.3364   -0.9458 H   0  0  0  0  0  0  0  0  0  0  0  0
   -4.8084   -2.9837   -0.8312 O   0  0  0  0  0  0  0  0  0  0  0  0
    2.8725    4.3840    1.7288 C   0  0  0  0  0  0  0  0  0  0  0  0
  1  2  1  0      
  2  3  1  0      
  3  4  1  0      
  4  5  1  0      
  5  6  1  0      
  6  1  1  0      
  2  7  1  0      
  7  8  1  0      
  8  9  2  0      
  9 10  1  0      
 10  3  1  0      
  4 11  1  0      
 11 12  1  0      
 12 13  1  0      
 13  5  1  0      
 14 15  1  0      
 15 16  1  0      
 17 18  1  0      
 18 19  1  0      
 19 14  1  0      
 18 20  1  0      
 21 22  1  0      
 19 22  2  0      
  5 23  1  0      
  3 24  1  0      
  7 25  1  0      
  7 26  1  0      
 26 27  1  0      
 27 28  1  0      
 28 29  1  0      
 29  8  1  0      
  4 30  1  0      
  2 31  1  0      
 28 32  1  0      
 16 33  1  0      
 13 16  1  0      
M  END
$$$$
