# Supplementary material for: Pachydictyols B and C: New Diterpenes from Dictyota dichotoma Hudson
Source: MDPI journal article supplement (doi:10.3390/md11093109), 2013-08-22
Supplement: s13 [file s13]

marinedrugs-11-03109-s006.mol
  ChemDraw11261316272D

 33 36  0  0  0  0  0  0  0  0999 V2000
   -1.6268    0.5269    0.0000 C   0  0  0  0  0  0  0  0  0  0  0  0
   -1.6268   -0.2981    0.0000 C   0  0  0  0  0  0  0  0  0  0  0  0
   -0.9123   -0.7106    0.0000 C   0  0  0  0  0  0  0  0  0  0  0  0
   -0.1979   -0.2981    0.0000 C   0  0  0  0  0  0  0  0  0  0  0  0
   -0.1979    0.5269    0.0000 C   0  0  0  0  0  0  0  0  0  0  0  0
   -0.9123    0.9394    0.0000 C   0  0  0  0  0  0  0  0  0  0  0  0
   -2.3413   -0.7106    0.0000 C   0  0  0  0  0  0  0  0  0  0  0  0
   -2.3413   -1.5356    0.0000 C   0  0  0  0  0  0  0  0  0  0  0  0
   -1.6268   -1.9481    0.0000 C   0  0  0  0  0  0  0  0  0  0  0  0
   -0.9123   -1.5356    0.0000 C   0  0  0  0  0  0  0  0  0  0  0  0
    0.5867   -0.5530    0.0000 C   0  0  0  0  0  0  0  0  0  0  0  0
    1.0717    0.1144    0.0000 C   0  0  0  0  0  0  0  0  0  0  0  0
    0.5867    0.7819    0.0000 C   0  0  0  0  0  0  0  0  0  0  0  0
    2.3258    1.0426    0.0000 C   0  0  0  0  0  0  0  0  0  0  0  0
    1.7428    1.6218    0.0000 C   0  0  0  0  0  0  0  0  0  0  0  0
    0.9223    1.5356    0.0000 C   0  0  0  0  0  0  0  0  0  0  0  0
    3.1976   -0.3805    0.0000 C   0  0  0  0  0  0  0  0  0  0  0  0
    3.5331    0.3732    0.0000 C   0  0  0  0  0  0  0  0  0  0  0  0
    3.0482    1.0406    0.0000 C   0  0  0  0  0  0  0  0  0  0  0  0
    4.3536    0.4594    0.0000 C   0  0  0  0  0  0  0  0  0  0  0  0
    4.2042    1.8805    0.0000 C   0  0  0  0  0  0  0  0  0  0  0  0
    3.3837    1.7943    0.0000 C   0  0  0  0  0  0  0  0  0  0  0  0
   -0.1979    1.3519    0.0000 C   0  0  0  0  0  0  0  0  0  0  0  0
   -0.9123    0.1144    0.0000 H   0  0  0  0  0  0  0  0  0  0  0  0
   -2.3413    0.1144    0.0000 C   0  0  0  0  0  0  0  0  0  0  0  0
   -3.0558   -0.2981    0.0000 C   0  0  0  0  0  0  0  0  0  0  0  0
   -3.7702   -0.7106    0.0000 C   0  0  0  0  0  0  0  0  0  0  0  0
   -3.7702   -1.5356    0.0000 C   0  0  0  0  0  0  0  0  0  0  0  0
   -3.0558   -1.9481    0.0000 C   0  0  0  0  0  0  0  0  0  0  0  0
   -0.1979   -1.1231    0.0000 H   0  0  0  0  0  0  0  0  0  0  0  0
   -1.6268   -1.1231    0.0000 H   0  0  0  0  0  0  0  0  0  0  0  0
   -4.3536   -2.1189    0.0000 O   0  0  0  0  0  0  0  0  0  0  0  0
    0.3389    2.1189    0.0000 C   0  0  0  0  0  0  0  0  0  0  0  0
  1  2  1  0      
  2  3  1  0      
  3  4  1  0      
  4  5  1  0      
  5  6  1  0      
  6  1  1  0      
  2  7  1  0      
  7  8  1  0      
  8  9  2  0      
  9 10  1  0      
 10  3  1  0      
  4 11  1  0      
 11 12  1  0      
 12 13  1  0      
 13  5  1  0      
 14 15  1  0      
 15 16  1  0      
 17 18  1  0      
 18 19  1  0      
 19 14  1  0      
 18 20  1  0      
 21 22  1  0      
 19 22  2  0      
  5 23  1  1      
  3 24  1  1      
  7 25  1  1      
  7 26  1  0      
 26 27  1  0      
 27 28  1  0      
 28 29  1  0      
 29  8  1  0      
  4 30  1  6      
  2 31  1  6      
 28 32  1  1      
 16 33  1  6      
 13 16  1  1      
M  END
