# Supplementary material for: Pachydictyols B and C: New Diterpenes from Dictyota dichotoma Hudson
Source: MDPI journal article supplement (doi:10.3390/md11093109), 2013-08-22
Supplement: s14 [file s14]

marinedrugs-11-03109-s007.mol
  corina  12171321223D 1   1.00000     0.00000 
CORINA 3.49 0023  12.04.2013
 15 17  0  0  0  0  0  0  0  0999 V2000
    0.4638    1.7177   -0.0724 C   0  0  0  0  0  0  0  0  0  0  0  0
    0.5066    0.1937   -0.0673 C   0  0  0  0  0  0  0  0  0  0  0  0
    1.3603   -0.3337   -1.2168 C   0  0  0  0  0  0  0  0  0  0  0  0
    2.7591    0.2204   -1.2106 C   0  0  0  0  0  0  0  0  0  0  0  0
    2.5747    1.7586   -1.3403 C   0  0  0  0  0  0  0  0  0  0  0  0
    1.8526    2.3753   -0.1887 C   0  0  0  0  0  0  0  0  0  0  0  0
    3.5851    0.4244   -2.4667 C   0  0  0  0  0  0  0  0  0  0  0  0
    2.5876    0.9198   -3.5561 C   0  0  0  0  0  0  0  0  0  0  0  0
    1.8043    1.9485   -2.6933 C   0  0  0  0  0  0  0  0  0  0  0  0
    3.9459    1.5946   -1.6263 O   0  0  0  0  0  0  0  0  0  0  0  0
    4.6611   -0.5859   -2.8686 C   0  0  0  0  0  0  0  0  0  0  0  0
    3.6107   -0.3413   -0.0666 C   0  0  0  0  0  0  0  0  0  0  0  0
    1.6341    3.8737   -0.5046 C   0  0  0  0  0  0  0  0  0  0  0  0
    2.6107    2.2918    1.1298 C   0  0  0  0  0  0  0  0  0  0  0  0
    0.9536   -1.1131   -2.0377 O   0  0  0  0  0  0  0  0  0  0  0  0
  1  2  1  0      
  2  3  1  0      
  3  4  1  0      
  4  5  1  0      
  5  6  1  0      
  6  1  1  0      
  4  7  1  0      
  7  8  1  0      
  8  9  1  0      
  9  5  1  0      
  5 10  1  0      
  7 10  1  0      
  7 11  1  0      
  4 12  1  0      
  6 13  1  0      
  6 14  1  0      
  3 15  2  0      
M  END
$$$$
