# Supplementary material for: Pachydictyols B and C: New Diterpenes from Dictyota dichotoma Hudson
Source: MDPI journal article supplement (doi:10.3390/md11093109), 2013-08-22
Supplement: s15 [file s15]

marinedrugs-11-03109-s007.mol
  ChemDraw11261316282D

 15 17  0  0  0  0  0  0  0  0999 V2000
   -1.4640    0.4678    0.0000 C   0  0  0  0  0  0  0  0  0  0  0  0
   -1.4640   -0.3572    0.0000 C   0  0  0  0  0  0  0  0  0  0  0  0
   -0.7495   -0.7697    0.0000 C   0  0  0  0  0  0  0  0  0  0  0  0
   -0.0351   -0.3572    0.0000 C   0  0  0  0  0  0  0  0  0  0  0  0
   -0.0351    0.4678    0.0000 C   0  0  0  0  0  0  0  0  0  0  0  0
   -0.7495    0.8803    0.0000 C   0  0  0  0  0  0  0  0  0  0  0  0
    0.7495   -0.6122    0.0000 C   0  0  0  0  0  0  0  0  0  0  0  0
    1.2345    0.0553    0.0000 C   0  0  0  0  0  0  0  0  0  0  0  0
    0.7495    0.7227    0.0000 C   0  0  0  0  0  0  0  0  0  0  0  0
    0.6794    0.0553    0.0000 O   0  0  0  0  0  0  0  0  0  0  0  0
    1.4640   -1.0247    0.0000 C   0  0  0  0  0  0  0  0  0  0  0  0
   -0.0351   -1.1822    0.0000 C   0  0  0  0  0  0  0  0  0  0  0  0
   -1.1620    1.5947    0.0000 C   0  0  0  0  0  0  0  0  0  0  0  0
   -0.3370    1.5947    0.0000 C   0  0  0  0  0  0  0  0  0  0  0  0
   -0.7495   -1.5947    0.0000 O   0  0  0  0  0  0  0  0  0  0  0  0
  1  2  1  0      
  2  3  1  0      
  3  4  1  0      
  4  5  1  0      
  5  6  1  0      
  6  1  1  0      
  4  7  1  0      
  7  8  1  0      
  8  9  1  0      
  9  5  1  0      
  5 10  1  0      
  7 10  1  0      
  7 11  1  0      
  4 12  1  0      
  6 13  1  0      
  6 14  1  0      
  3 15  2  0      
M  END
