# Supplementary material for: Pachydictyols B and C: New Diterpenes from Dictyota dichotoma Hudson
Source: MDPI journal article supplement (doi:10.3390/md11093109), 2013-08-22
Supplement: s16 [file s16]

marinedrugs-11-03109-s008.mol
  corina  12171321223D 1   1.00000     0.00000 
CORINA 3.49 0023  12.04.2013
 12 12  0  0  0  0  0  0  0  0999 V2000
   -0.0187    1.5265    0.0104 C   0  0  0  0  0  0  0  0  0  0  0  0
    0.0021   -0.0041    0.0020 C   0  0  0  0  0  0  0  0  0  0  0  0
    0.9754   -0.4816    1.0865 C   0  0  0  0  0  0  0  0  0  0  0  0
    2.3956   -0.0895    0.6770 C   0  0  0  0  0  0  0  0  0  0  0  0
    2.4524    1.3229    0.3216 N   0  0  0  0  0  0  0  0  0  0  0  0
    1.3864    2.0566   -0.0001 C   0  0  0  0  0  0  0  0  0  0  0  0
    1.5609    3.2137   -0.3187 O   0  0  0  0  0  0  0  0  0  0  0  0
    3.7630    1.9777    0.3178 C   0  0  0  0  0  0  0  0  0  0  0  0
    4.3929    1.8497   -1.0706 C   0  0  0  0  0  0  0  0  0  0  0  0
    5.7616    2.5335   -1.0747 C   0  0  0  0  0  0  0  0  0  0  0  0
    6.3916    2.4055   -2.4631 C   0  0  0  0  0  0  0  0  0  0  0  0
    8.1503    3.2841   -2.4683 Br  0  0  0  0  0  0  0  0  0  0  0  0
  1  2  1  0      
  2  3  1  0      
  3  4  1  0      
  4  5  1  0      
  5  6  1  0      
  6  1  1  0      
  6  7  2  0      
  5  8  1  0      
  8  9  1  0      
  9 10  1  0      
 10 11  1  0      
 11 12  1  0      
M  END
$$$$
