# Supplementary material for: Pachydictyols B and C: New Diterpenes from Dictyota dichotoma Hudson
Source: MDPI journal article supplement (doi:10.3390/md11093109), 2013-08-22
Supplement: s17 [file s17]

marinedrugs-11-03109-s008.mol
  ChemDraw11261316282D

 12 12  0  0  0  0  0  0  0  0999 V2000
   -2.5006    0.0000    0.0000 C   0  0  0  0  0  0  0  0  0  0  0  0
   -2.5006   -0.8250    0.0000 C   0  0  0  0  0  0  0  0  0  0  0  0
   -1.7862   -1.2375    0.0000 C   0  0  0  0  0  0  0  0  0  0  0  0
   -1.0717   -0.8250    0.0000 C   0  0  0  0  0  0  0  0  0  0  0  0
   -1.0717    0.0000    0.0000 N   0  0  0  0  0  0  0  0  0  0  0  0
   -1.7862    0.4125    0.0000 C   0  0  0  0  0  0  0  0  0  0  0  0
   -1.7862    1.2375    0.0000 O   0  0  0  0  0  0  0  0  0  0  0  0
   -0.3572    0.4125    0.0000 C   0  0  0  0  0  0  0  0  0  0  0  0
    0.3572    0.0000    0.0000 C   0  0  0  0  0  0  0  0  0  0  0  0
    1.0717    0.4125    0.0000 C   0  0  0  0  0  0  0  0  0  0  0  0
    1.7862    0.0000    0.0000 C   0  0  0  0  0  0  0  0  0  0  0  0
    2.5006    0.4125    0.0000 Br  0  0  0  0  0  0  0  0  0  0  0  0
  1  2  1  0      
  2  3  1  0      
  3  4  1  0      
  4  5  1  0      
  5  6  1  0      
  6  1  1  0      
  6  7  2  0      
  5  8  1  0      
  8  9  1  0      
  9 10  1  0      
 10 11  1  0      
 11 12  1  0      
M  END
