# Supplementary material for: Pachydictyols B and C: New Diterpenes from Dictyota dichotoma Hudson
Source: MDPI journal article supplement (doi:10.3390/md11093109), 2013-08-22
Supplement: s18 [file s18]

marinedrugs-11-03109-s009.mol
  corina  12171321223D 1   1.00000     0.00000 
CORINA 3.49 0023  12.04.2013
  9  8  0  0  0  0  0  0  0  0999 V2000
   -0.0187    1.5258    0.0104 C   0  0  0  0  0  0  0  0  0  0  0  0
    0.0021   -0.0041    0.0020 C   0  0  0  0  0  0  0  0  0  0  0  0
    0.7182   -0.4975   -1.2568 C   0  0  0  0  0  0  0  0  0  0  0  0
    0.7390   -2.0273   -1.2652 C   0  0  0  0  0  0  0  0  0  0  0  0
    1.4551   -2.5207   -2.5240 C   0  0  0  0  0  0  0  0  0  0  0  0
    1.4758   -4.0506   -2.5324 C   0  0  0  0  0  0  0  0  0  0  0  0
   -0.2209   -4.6776   -2.6686 S   0  0  0  0  0  0  0  0  0  0  0  0
    2.2988   -4.5429   -3.7246 C   0  0  0  0  0  0  0  0  0  0  0  0
    2.1048   -4.5592   -1.2337 C   0  0  0  0  0  0  0  0  0  0  0  0
  1  2  1  0      
  2  3  1  0      
  3  4  1  0      
  4  5  1  0      
  5  6  1  0      
  6  7  1  0      
  6  8  1  0      
  6  9  1  0      
M  STY  1   1 SRU
M  SLB  1   1   1
M  SCN  1   1 HT 
M  SAL   1  2   3   4
M  SBL   1  2   4   2
M  SMT   1 n = 5
M  SDI   1  4    0.3572    0.6188    0.3572   -0.2062
M  SDI   1  4   -1.0717   -0.2062   -1.0717    0.6188
M  END
$$$$
