# Supplementary material for: Pachydictyols B and C: New Diterpenes from Dictyota dichotoma Hudson
Source: MDPI journal article supplement (doi:10.3390/md11093109), 2013-08-22
Supplement: s19 [file s19]

marinedrugs-11-03109-s009.mol
  ChemDraw11261317292D

  9  8  0  0  0  0  0  0  0  0999 V2000
   -2.1434    0.4125    0.0000 C   0  0  0  0  0  0  0  0  0  0  0  0
   -1.4289    0.0000    0.0000 C   0  0  0  0  0  0  0  0  0  0  0  0
   -0.7145    0.4125    0.0000 C   0  0  0  0  0  0  0  0  0  0  0  0
   -0.0000    0.0000    0.0000 C   0  0  0  0  0  0  0  0  0  0  0  0
    0.7145    0.4125    0.0000 C   0  0  0  0  0  0  0  0  0  0  0  0
    1.4289    0.0000    0.0000 C   0  0  0  0  0  0  0  0  0  0  0  0
    2.1434    0.4125    0.0000 S   0  0  0  0  0  0  0  0  0  0  0  0
    1.4289    0.8250    0.0000 C   0  0  0  0  0  0  0  0  0  0  0  0
    1.4289   -0.8250    0.0000 C   0  0  0  0  0  0  0  0  0  0  0  0
  1  2  1  0      
  2  3  1  0      
  3  4  1  0      
  4  5  1  0      
  5  6  1  0      
  6  7  1  0      
  6  8  1  0      
  6  9  1  0      
M  STY  1   1 SRU
M  SLB  1   1   1
M  SCN  1   1 HT 
M  SAL   1  2   3   4
M  SBL   1  2   4   2
M  SMT   1 n = 5
M  SDI   1  4    0.3572    0.6188    0.3572   -0.2062
M  SDI   1  4   -1.0717   -0.2062   -1.0717    0.6188
M  END
